# Supplementary material
Source: Springer Nature journal article supplement (https://www.springermedizin.de/resource/supplementary/12887_2013_1109_MOESM2_ESM.pdf/9476526)
Supplement: MOESM2 [file 9476526]

Validity and  
reliability

Reliability  
only

Chiropractic  
clinic  
n=34

Sport teams  
n= 18

Validity  
only  
n=8

Validity &  
reliability  
n=26

Incomplete  
n= 5

Validity  
total  
n=34

Reliability  
total  
n=39
